# Supplementary material for: Spatiotemporal patterns in differences between the 137Cs concentrations of forest and stream litters: effect of leaching
Source: Royal Society of Chemistry journal article supplement (doi:10.1039/d3em00236e), 2023-01-01
Supplement: d3em00236e1.xlsx [file d3em00236e1.xlsx]

## Sheet: Sheet1
Table S1 The raw data of initial 137Cs deposition and 137Cs activity concentrations in litter used in "Spatiotemporal patterns in differences between the 137Cs concentrations of forest and stream litters: effect of leaching".
site	elapsed year	litter type	place	initial 137Cs deposition (kBq/m2)	137Cs activity concentration (Bq/kg-dry weight)
3	3.24	conifer	forest	660.2	40610.3
3	3.24	conifer	forest	660.2	37147.9
3	3.24	conifer	forest	660.2	37072
2	3.24	conifer	forest	680	24290
2	3.24	conifer	forest	680	24239
2	3.24	conifer	forest	680	28160
6	3.24	conifer	forest	310.7	10557.3
6	3.24	conifer	forest	310.7	11760.3
6	3.24	conifer	forest	310.7	10764.3
4	3.24	conifer	forest	644.6	20891
4	3.24	conifer	forest	644.6	20143
4	3.24	conifer	forest	644.6	22763
5	3.24	conifer	forest	376	14052.1
5	3.24	conifer	forest	376	13817.1
5	3.24	conifer	forest	376	13288.2
1	3.24	conifer	forest	1264.2	36518.4
1	3.24	conifer	forest	1264.2	36503.4
1	3.24	conifer	forest	1264.2	34761.6
7	3.24	conifer	forest	69	2842.49
7	3.24	conifer	forest	69	2559.09
7	3.24	conifer	forest	69	3453.19
6	3.24	conifer	forest	310.7	22620.6
6	3.24	conifer	forest	310.7	24141.8
6	3.24	conifer	forest	310.7	14316.4
3	3.24	conifer	stream	660.2	10280.3
3	3.24	conifer	stream	660.2	8924.14
3	3.24	conifer	stream	660.2	9685.19
2	3.24	conifer	stream	680	9384.9
2	3.24	conifer	stream	680	9491
2	3.24	conifer	stream	680	11035
6	3.24	conifer	stream	310.7	9306.41
6	3.24	conifer	stream	310.7	8584.06
6	3.24	conifer	stream	310.7	8949.93
4	3.24	conifer	stream	644.6	12527
4	3.24	conifer	stream	644.6	12634
4	3.24	conifer	stream	644.6	11176
5	3.24	conifer	stream	376	4685.5
5	3.24	conifer	stream	376	4667.4
5	3.24	conifer	stream	376	4687.5
1	3.24	conifer	stream	1264.2	19241.6
1	3.24	conifer	stream	1264.2	18302.7
1	3.24	conifer	stream	1264.2	20291.4
7	3.24	conifer	stream	69	1071.35
7	3.24	conifer	stream	69	1312.85
7	3.24	conifer	stream	69	1229.33
6	3.24	conifer	stream	310.7	6134.58
6	3.24	conifer	stream	310.7	6078.5
6	3.24	conifer	stream	310.7	4459.74
3	3.24	deciduous	forest	660.2	11000.9
3	3.24	deciduous	forest	660.2	9271.14
3	3.24	deciduous	forest	660.2	9562.28
4	3.24	deciduous	forest	644.6	5422.6
4	3.24	deciduous	forest	644.6	6384
4	3.24	deciduous	forest	644.6	6487
5	3.24	deciduous	forest	376	4131.74
5	3.24	deciduous	forest	376	4008.35
5	3.24	deciduous	forest	376	4274.63
1	3.24	deciduous	forest	1264.2	8295.85
1	3.24	deciduous	forest	1264.2	8432.93
1	3.24	deciduous	forest	1264.2	8619.71
7	3.24	deciduous	forest	69	1348.97
7	3.24	deciduous	forest	69	1570.66
7	3.24	deciduous	forest	69	1628.27
6	3.24	deciduous	forest	310.7	4682.39
6	3.24	deciduous	forest	310.7	6740.28
6	3.24	deciduous	forest	310.7	5710.91
3	3.24	deciduous	stream	660.2	3995.44
3	3.24	deciduous	stream	660.2	5068.34
3	3.24	deciduous	stream	660.2	4267.39
4	3.24	deciduous	stream	644.6	2441.4
4	3.24	deciduous	stream	644.6	2137.8
4	3.24	deciduous	stream	644.6	1994.8
5	3.24	deciduous	stream	376	1617.4
5	3.24	deciduous	stream	376	1574.9
5	3.24	deciduous	stream	376	1486.61
1	3.24	deciduous	stream	1264.2	3431.67
1	3.24	deciduous	stream	1264.2	3446.56
1	3.24	deciduous	stream	1264.2	4350.25
7	3.24	deciduous	stream	69	641.986
7	3.24	deciduous	stream	69	1149.1
7	3.24	deciduous	stream	69	947.702
6	3.24	deciduous	stream	310.7	3289.01
6	3.24	deciduous	stream	310.7	3760.97
6	3.24	deciduous	stream	310.7	4113.74
3	11.24	conifer	forest	660.2	1668.68
3	11.24	conifer	forest	660.2	1614.93
3	11.24	conifer	forest	660.2	1634.91
1	11.24	conifer	forest	1264.2	977.169
1	11.24	conifer	forest	1264.2	1035.58
1	11.24	conifer	forest	1264.2	1106.72
6	11.24	conifer	forest	310.7	309.978
6	11.24	conifer	forest	310.7	277.927
6	11.24	conifer	forest	310.7	300.078
5	11.24	conifer	forest	376	388.194
5	11.24	conifer	forest	376	379.119
5	11.24	conifer	forest	376	366.81
2	11.24	conifer	forest	680	1636.61
2	11.24	conifer	forest	680	1549.8
2	11.24	conifer	forest	680	1427.99
7	11.24	conifer	forest	69	18.2042
7	11.24	conifer	forest	69	30.6341
7	11.24	conifer	forest	69	21.3109
5	11.24	conifer	stream	376	107.419
5	11.24	conifer	stream	376	104.823
5	11.24	conifer	stream	376	107.604
3	11.24	conifer	stream	660.2	482.084
3	11.24	conifer	stream	660.2	533.561
3	11.24	conifer	stream	660.2	556.099
6	11.24	conifer	stream	310.7	64.2504
6	11.24	conifer	stream	310.7	362.054
6	11.24	conifer	stream	310.7	76.3466
2	11.24	conifer	stream	680	547.8
2	11.24	conifer	stream	680	505.662
2	11.24	conifer	stream	680	1048.88
1	11.24	conifer	stream	1264.2	287.301
1	11.24	conifer	stream	1264.2	365.569
1	11.24	conifer	stream	1264.2	318.542
7	11.24	conifer	stream	69	6.33279
7	11.24	conifer	stream	69	7.7866
7	11.24	conifer	stream	69	7.28876
1	11.24	deciduous	forest	1264.2	1653.88
1	11.24	deciduous	forest	1264.2	1430.85
1	11.24	deciduous	forest	1264.2	1454.32
3	11.24	deciduous	forest	660.2	1260.44
3	11.24	deciduous	forest	660.2	1256.18
3	11.24	deciduous	forest	660.2	1125.38
2	11.24	deciduous	forest	680	863.06
2	11.24	deciduous	forest	680	969.717
2	11.24	deciduous	forest	680	845.224
5	11.24	deciduous	forest	376	243.193
5	11.24	deciduous	forest	376	234.982
5	11.24	deciduous	forest	376	238.646
4	11.24	deciduous	forest	644.6	649.435
4	11.24	deciduous	forest	644.6	659.945
4	11.24	deciduous	forest	644.6	688.301
7	11.24	deciduous	forest	69	55.5051
7	11.24	deciduous	forest	69	34.2514
7	11.24	deciduous	forest	69	40.6939
2	11.24	deciduous	stream	680	543.26
2	11.24	deciduous	stream	680	509.797
2	11.24	deciduous	stream	680	603.811
1	11.24	deciduous	stream	1264.2	419.807
1	11.24	deciduous	stream	1264.2	470.272
1	11.24	deciduous	stream	1264.2	459.162
3	11.24	deciduous	stream	660.2	484.085
3	11.24	deciduous	stream	660.2	331.616
3	11.24	deciduous	stream	660.2	256.272
4	11.24	deciduous	stream	644.6	502.834
4	11.24	deciduous	stream	644.6	501.679
4	11.24	deciduous	stream	644.6	591.774
5	11.24	deciduous	stream	376	202.606
5	11.24	deciduous	stream	376	247.002
5	11.24	deciduous	stream	376	223.125
7	11.24	deciduous	stream	69	26.0939
7	11.24	deciduous	stream	69	53.1773
7	11.24	deciduous	stream	69	44.0743
